# Supplementary material for: Charactering the ZFAND3 gene mapped in the sex-determining locus in hybrid tilapia (Oreochromis spp.)
Source: PubMed Central journal article supplement (PMC4853787; doi:10.1038/srep25471), 2016-05-03
Supplement: srep25471-s1.pdf [file srep25471-s1.pdf]

Supplementary files for the paper

**Charactering the *ZFAND3* gene and mapping it in the sex-determining locus in hybrid tilapia (*Oreochromis spp.*)**

**Keyi Ma<sup>1</sup>, Minghui Liao<sup>1</sup>, Feng Liu<sup>1</sup>, Baoqing Ye<sup>1</sup>, Fei Sun<sup>1</sup>, & Gen Hua Yue<sup>1,2,3\*</sup>**

<sup>1</sup>Molecular Population Genetics and Breeding Group, Temasek Life Sciences Laboratory, 1 Research Link, National University of Singapore, Singapore 117604, Republic of Singapore. <sup>2</sup>Department of Biological Sciences, National University of Singapore, 14 Science Drive 4, Singapore 117543, Republic of Singapore. <sup>3</sup>School of Biological Sciences, Nanyang Technological University, 60 Nanyang Drive, Singapore 637551, Republic of Singapore

\*Corresponding author

Dr. G.H. Yue

Temasek Life Sciences Laboratory, 1 Research Link, National University of Singapore, 117604  
Singapore, Republic of Singapore.

Tel.: + 65 68727405. Fax: + 65 68727007. Email: genhua@tll.org.sg

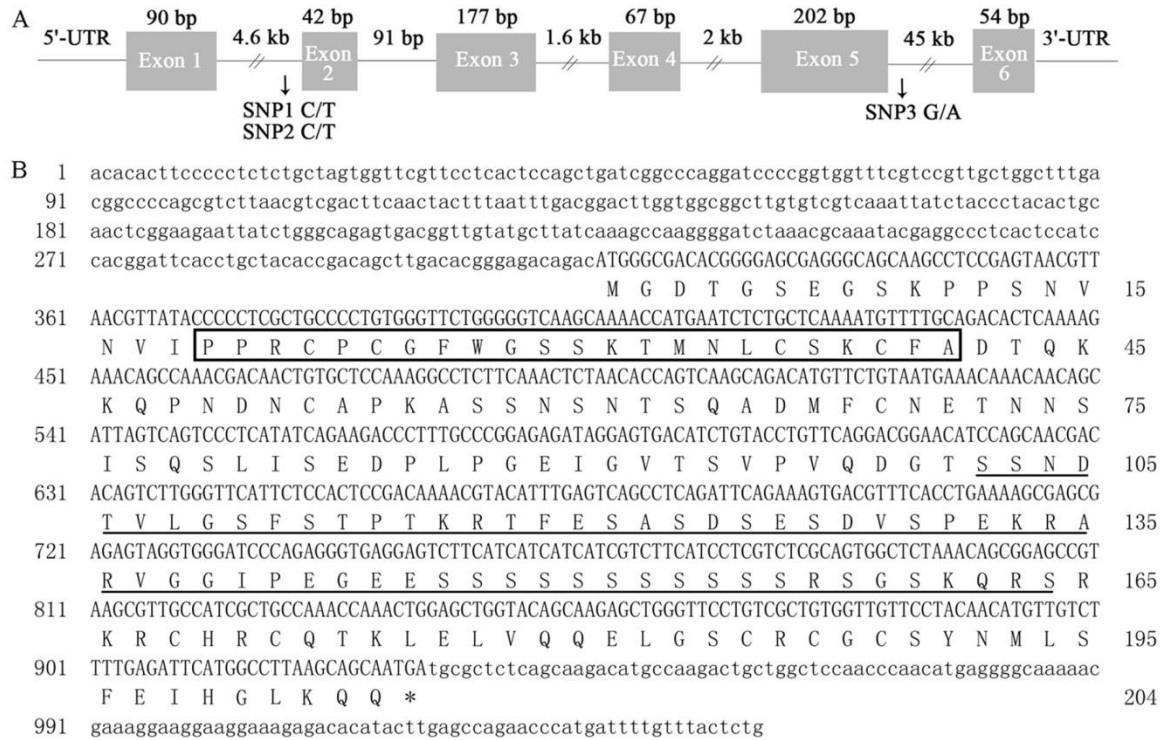

**Supplementary Figure S1. Genomic structure (A) and deduced amino acid sequence (B) of the *OsZFAND3* gene**

A: horizontal lines and boxes indicate introns and exons in genomic structure, respectively. The locations of the three SNPs are marked with arrows. B: nucleotides (top) are numbered from 5' to 3', starting from the initiator codon (ATG), while amino acid residues (bottom) are numbered starting with the first methionine (M) residue. The asterisk (\*) indicates the stop codon (TGA). A20-like zinc finger region and Serine-rich region are boxed and underline, respectively.

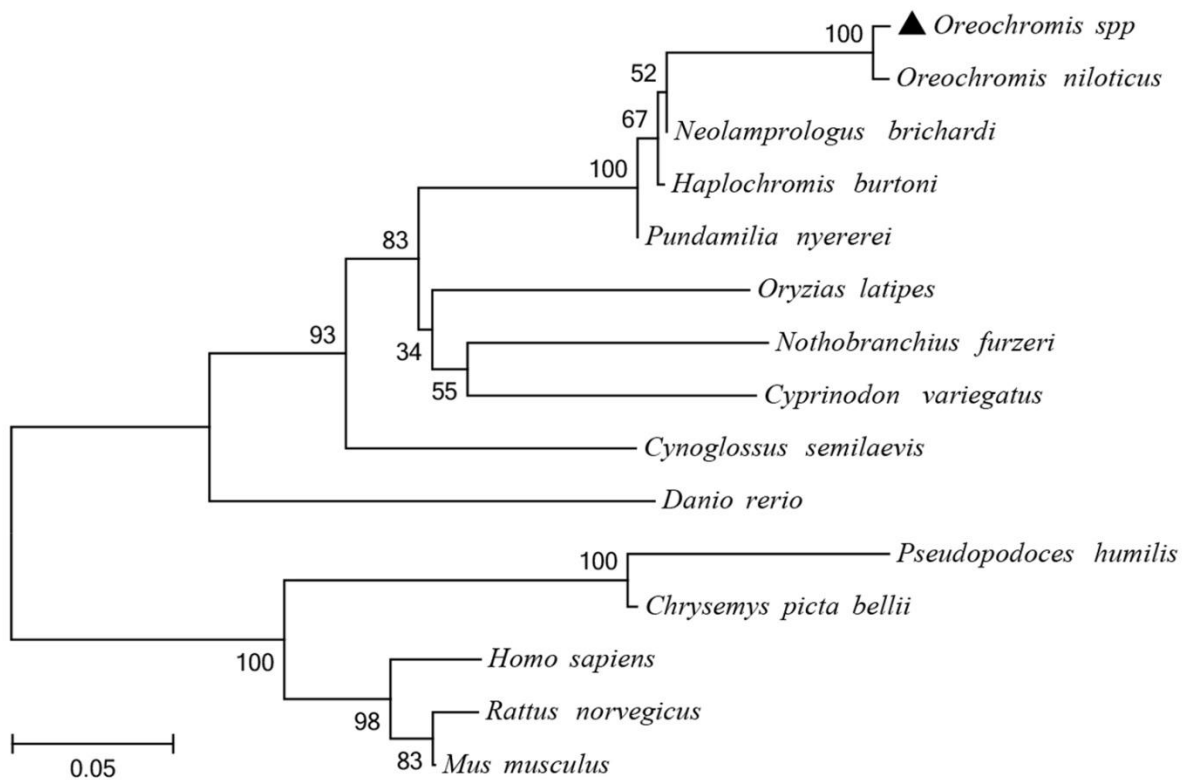

**Supplementary Figure S2. An unrooted phylogenetic tree of the ZFAND3 gene**

The phylogenetic tree was inferred by using the Neighbor-Joining method with whole deduced amino acid sequences. The values at the forks are Neighbor-Joining bootstrap supporting data. For the branch length, the distance given in the scale represents 0.05 amino acid substitution/site.

**Supplementary Table S1**

**Summary of genotypes of parents and their F<sub>1</sub> progenies of tilapia at SNP1, SNP2, SNP3, Onil\_1-89, Onil\_19-15 and Onil\_27-3 reported in this study (Please online Supplementary Dataset).**

**Supplementary Table S2****Amino acid identities (%) of the *ZFAND3* gene between hybrid tilapia and other representative species**

| <b>Gene</b>                     | <b>GenBank Accession No.</b> | <b>Amino acid</b> | <b>Identity</b> | <b>P-value</b> |
|---------------------------------|------------------------------|-------------------|-----------------|----------------|
| <i>Oreochromis niloticus</i>    | XP_005447615.1               | 204               | 99%             | 2e-149         |
| <i>Neolamprologus brichardi</i> | XP_006779955.1               | 238               | 93%             | 5e-123         |
| <i>Haplochromis burtoni</i>     | XP_005934639.1               | 238               | 93%             | 2e-122         |
| <i>Cynoglossus semilaevis</i>   | XP_008309070.1               | 254               | 69%             | 5e-96          |
| <i>Homo sapiens</i>             | NP_068762.1                  | 227               | 52%             | 2e-58          |
| <i>Rattus norvegicus</i>        | NP_001012175.1               | 227               | 51%             | 2e-57          |
| <i>Mus musculus</i>             | NP_683728.1                  | 205               | 47%             | 4e-50          |
| <i>Pseudopodoces humilis</i>    | XP_005533586.1               | 223               | 50%             | 1e-51          |
| <i>Chrysemys picta bellii</i>   | XP_008172961.1               | 210               | 45%             | 5e-47          |
| <i>Pundamilia nyererei</i>      | XP_005733397.1               | 216               | 82%             | 1e-93          |
| <i>Oryzias latipes</i>          | XP_004067319.1               | 244               | 72%             | 4e-86          |
| <i>Nothobranchius furzeri</i>   | XP_015808368.1               | 247               | 70%             | 3e-76          |
| <i>Cyprinodon variegatus</i>    | XP_015233722.1               | 248               | 72%             | 7e-73          |
| <i>Danio rerio</i>              | NP_001025346.1               | 226               | 58%             | 1e-54          |

**Supplementary Table S3****Evolution estimates of *ZFAND3* gene by dN/dS values using maximum likelihood analysis (Please online [Supplementary Dataset](#)).**

## Supplementary Table S4

### Summary of primer sets used for mapping and characterizing the *OsZFAND3* gene.

| Marker         | Primer sequence (5'-3')                                                       | Ta (°C) | Purpose      |
|----------------|-------------------------------------------------------------------------------|---------|--------------|
| Onil_1-89      | TCTCGCGATTCTCTGCTC<br>TTGCCATTGTCTTCCACTGTAA                                  | 55      | mapping      |
| Onil_19-15     | CACCTACAATTCTAGCACATACCA<br>GAATTTCTTCAAGGACACTGTCA                           | 55      | mapping      |
| Onil_27-3      | CCTGCAGTGGGTTTGGATT<br>AGTCAGCGATAGAAGAGGGAATAC                               | 55      | mapping      |
| x3 SNP1        | CCCCCAGACGCACTTATG<br>AGAGGCCTTTGGAGCACAG                                     | 50      | SNP          |
| x3 SNP2        | CATCGCTGCCAAACCAACT<br>TTCCGCCCCAATACAATCT                                    | 50      | SNP          |
| $\beta$ -actin | TGACCCAGATCATGTTTCGAGAC<br>GTGGTGGTGAAGGAGTAGCC                               | 60      | qPCR         |
| x3             | GCTGGGTTCTGTCGCTGTG<br>TCATGGGTTCTGGCTCAAGTATG                                | 60      | qPCR, ISH    |
| x3-pc          | <u>AGCTCGAGATGGGCGACACGGGGAGC</u><br><u>CCAAGCTTTTGCTGCTTAAGGCAATGAATCTCA</u> | 60      | Localization |

Note: the letters in italics were restriction sites. The letters underlined were protective bases.
